# Supplementary material for: Past, Present and Future: Combining habitat suitability and future landcover simulation for long-term conservation management of Indian rhino
Source: PubMed Central journal article supplement (PMC6969075; doi:10.1038/s41598-020-57547-0), 2020-01-17
Supplement: 41598_2020_57547_MOESM1_ESM.pdf [file 41598_2020_57547_MOESM1_ESM.pdf]

Supplementary information for article titled:

Past, Present and Future: Combining habitat suitability and future landcover simulation for long-term conservation management of Indian rhino

**Authors:** Tanoy Mukherjee, Lalit Kumar Sharma, Goutam K. Saha, Mukesh Thakur, Kailash Chandra

**Supplementary Table. S1 Accuracy assessment table for land cover classification of study area for the year 2018.**

| Land cover classification for GNP                             |            |                             |           |            |           |           |          |              |                  |
|---------------------------------------------------------------|------------|-----------------------------|-----------|------------|-----------|-----------|----------|--------------|------------------|
| Contingency Matrix                                            |            |                             |           |            |           |           |          |              |                  |
|                                                               |            | Observed land cover Classes |           |            |           |           |          | Grand Total: | User's Accuracy: |
|                                                               |            | Water                       | Bare land | River bank | Grassland | Shrubland | Woodland |              |                  |
| Mapped land cover Classes:                                    | Water      | 56                          | 0         | 6          | 0         | 0         | 0        | 61           | 91.803           |
|                                                               | Bare land  | 1                           | 52        | 3          | 3         | 0         | 0        | 64           | 81.250           |
|                                                               | River bank | 3                           | 5         | 51         | 1         | 0         | 0        | 55           | 92.727           |
|                                                               | Grassland  | 0                           | 0         | 0          | 49        | 4         | 2        | 54           | 90.741           |
|                                                               | Shrubland  | 0                           | 3         | 0          | 7         | 53        | 2        | 68           | 77.941           |
|                                                               | Woodland   | 0                           | 0         | 0          | 0         | 3         | 56       | 58           | 96.552           |
| Grand Total:                                                  |            | 60                          | 60        | 60         | 60        | 60        | 60       | 60           |                  |
| Producer's Accuracy:                                          |            | 93.333                      | 86.667    | 85.000     | 81.667    | 88.333    | 93.333   |              |                  |
| Samples: 360 Overall Accuracy: 88.05% Kappa Statistic: 85.70% |            |                             |           |            |           |           |          |              |                  |

**Kappa Coefficient**

Number of observed agreements: 317 ( 88.06% of the observations)

Number of agreements expected by chance: 60.0 ( 16.67% of the observations)

Kappa= 0.857

SE of kappa = 0.021

95% confidence interval: From 0.816 to 0.897

The strength of agreement is considered to be 'very good'.

The calculations above only consider exact matches between observers. If the categories (A, B, C...) are ordered, you may also wish to consider close matches. In other words, if one observer classifies a subject into group B and the other into group C, this is closer than if one classifies into A and the other into D. The calculation of weighted kappa, below, assumes the categories are ordered and accounts for how far apart the two raters are. This calculation uses linear weights.

Weighted Kappa= 0.910

**Supplementary Figure S1.** Land cover of all six different classes in Km<sup>2</sup> area i.e. for Water, River bank, Bareland, Woodland, Grassland and Shrubland in years 1998, 2008, 2018 and 2028. Different colour code have been used to visualize different decadal images.

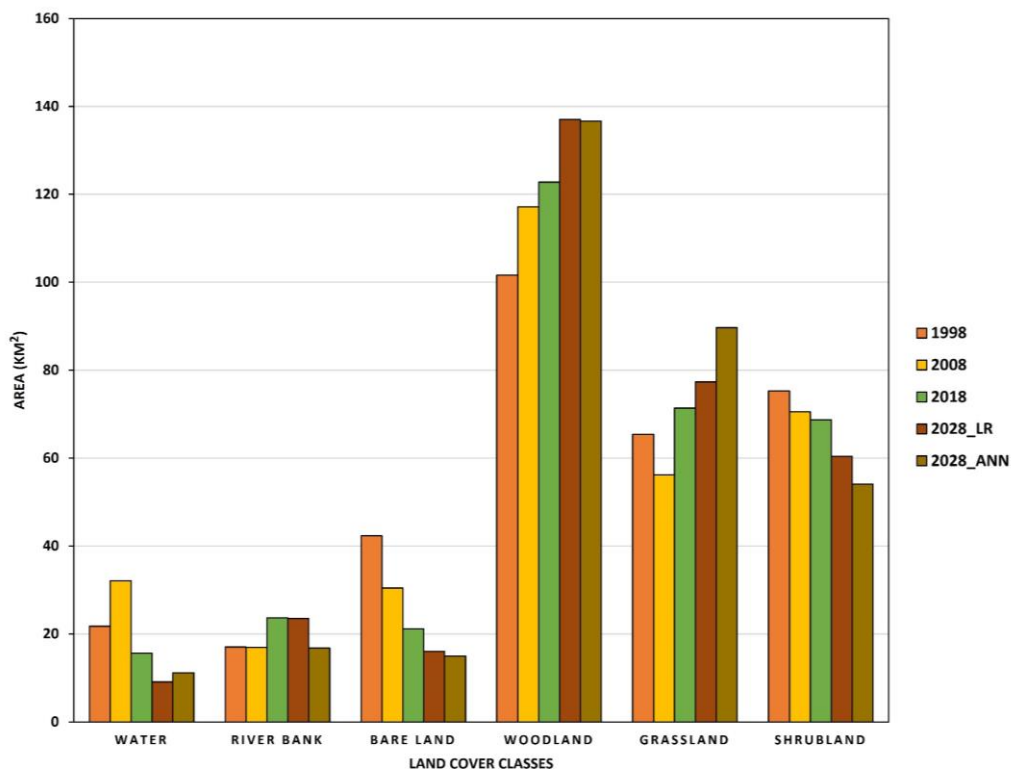

**Supplementary Figure S2.** Delta change in percentage of land cover of all six different classes i.e. in Water, River bank, Bareland, Woodland, Grassland and Shrubland in years 1998, 2008, 2018 and 2028. Different colour code have been used to visualize different landcover types.

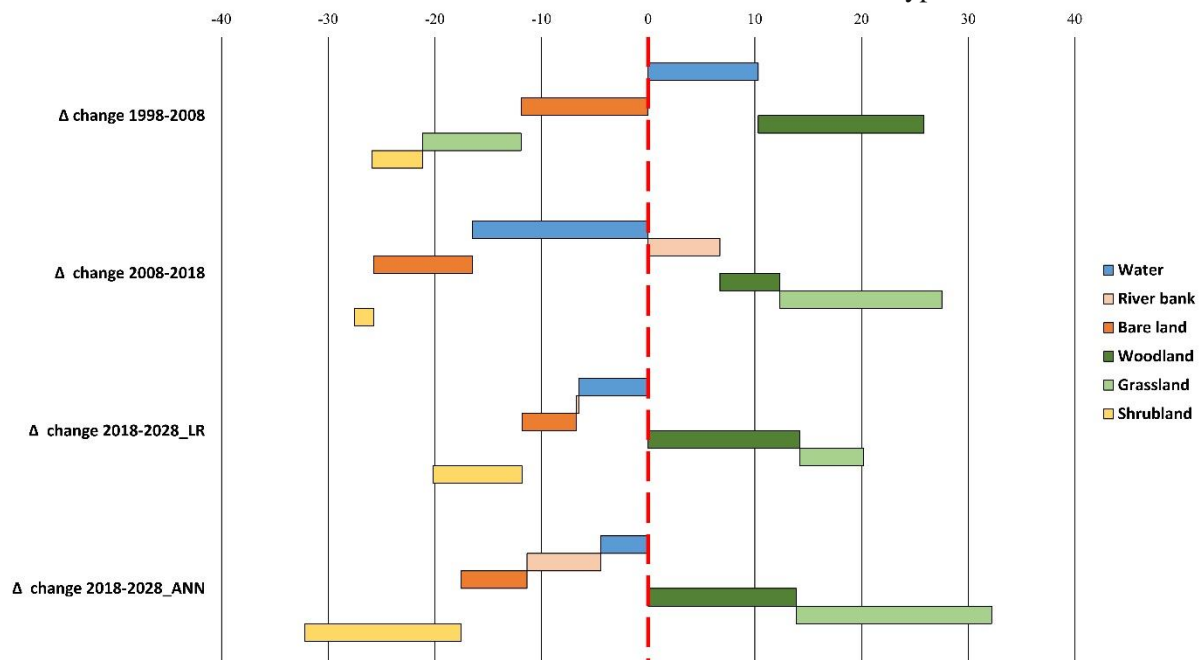

**Supplementary Table S2.** Transitional probability matrix of Landcover change from the year 1998-2008 and from 2008-2018.

| Transition period | Land Cover types |        |            |           |          |           |           |
|-------------------|------------------|--------|------------|-----------|----------|-----------|-----------|
| <b>1998-2008</b>  | <b>To</b>        | Water  | River bank | Bare land | Woodland | Grassland | Shrubland |
| <b>From</b>       | Water            | 0.4521 | 0.2564     | 0.0425    | 0.0060   | 0.0069    | 0.2361    |
|                   | River bank       | 0.4780 | 0.3315     | 0.1054    | 0.0000   | 0.0019    | 0.0833    |
|                   | Bare land        | 0.1604 | 0.0823     | 0.2204    | 0.0026   | 0.0256    | 0.5087    |
|                   | Woodland         | 0.0022 | 0.0006     | 0.0045    | 0.8681   | 0.1182    | 0.0064    |
|                   | Grassland        | 0.0583 | 0.0271     | 0.0144    | 0.2328   | 0.3259    | 0.3415    |
|                   | Shrubland        | 0.0436 | 0.0057     | 0.2261    | 0.1792   | 0.2871    | 0.2584    |
| <b>2008-2018</b>  | <b>To</b>        |        |            |           |          |           |           |
| <b>From</b>       | Water            | 0.2404 | 0.3657     | 0.1034    | 0.0014   | 0.2531    | 0.0359    |
|                   | River bank       | 0.1458 | 0.5381     | 0.1956    | 0.0000   | 0.1055    | 0.0150    |
|                   | Bare land        | 0.0483 | 0.0131     | 0.1778    | 0.0237   | 0.1674    | 0.5696    |
|                   | Woodland         | 0.0020 | 0.0002     | 0.0001    | 0.8796   | 0.0269    | 0.0912    |
|                   | Grassland        | 0.0084 | 0.0093     | 0.0029    | 0.3155   | 0.2971    | 0.3669    |
|                   | Shrubland        | 0.0462 | 0.0268     | 0.1271    | 0.0173   | 0.5178    | 0.2648    |

**Supplementary Table S3.** Validation of both ANN an LR model for 2028 landscape prediction. Showing the correctness percentage along with Kappa statistics for both ANN and LR stimulated models.

| Validation matrix       | ANN      | LR       |
|-------------------------|----------|----------|
| <b>% of correctness</b> | 82.10949 | 67.56809 |
| <b>Kappa (overall)</b>  | 0.75635  | 0.55978  |
| <b>Kappa (histo)</b>    | 0.8644   | 0.9153   |
| <b>Kappa (loc)</b>      | 0.875    | 0.61159  |

**Supplementary Figure. S3. Learning curve for Artificial Neural Network (ANN).** Where training data is represented by green and validation data has been represented by red colour.

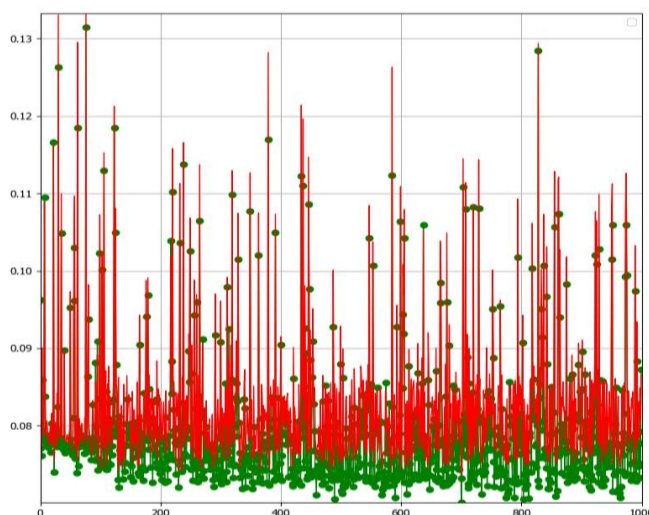

**Supplementary Figure. S4. Validation through multiple resolution budget for ANN stimulated landcover of 2028.** After stimulation of future landscape for 2028 by ANN model quality have been assed based on various assessment on the similarity between the forecast and the true state of the territory. Green- represents no location, no quantity inform; Purple- represents medium location, medium quantity inform; Yellow- represents perfect location, perfect quantity inform; Red-represents no location, medium quantity inform; Black- represents perfect location, medium quantity inform.

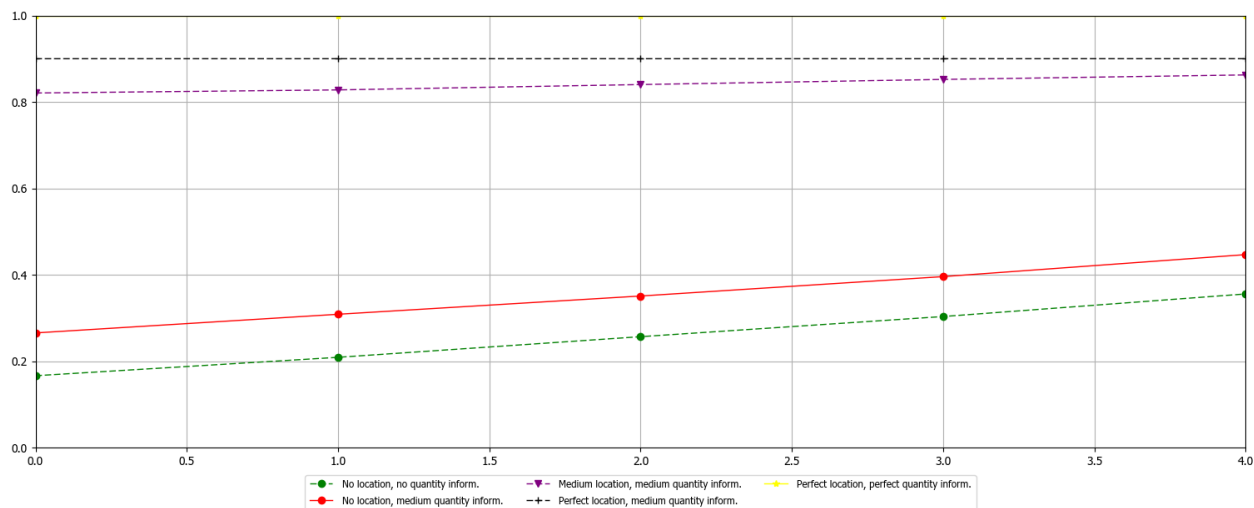

**Supplementary Figure. S5 Validation through multiple resolution budget for LR stimulated landcover of 2028.** After stimulation of future landscape for 2028 by LR model quality have been assed based on various assessment on the similarity between the forecast and the true state of the territory. Green- represents no location, no quantity inform; Purple- represents medium location, medium quantity inform; Yellow- represents perfect location, perfect quantity inform; Red-represents no location, medium quantity inform; Black- represents perfect location, medium quantity inform.

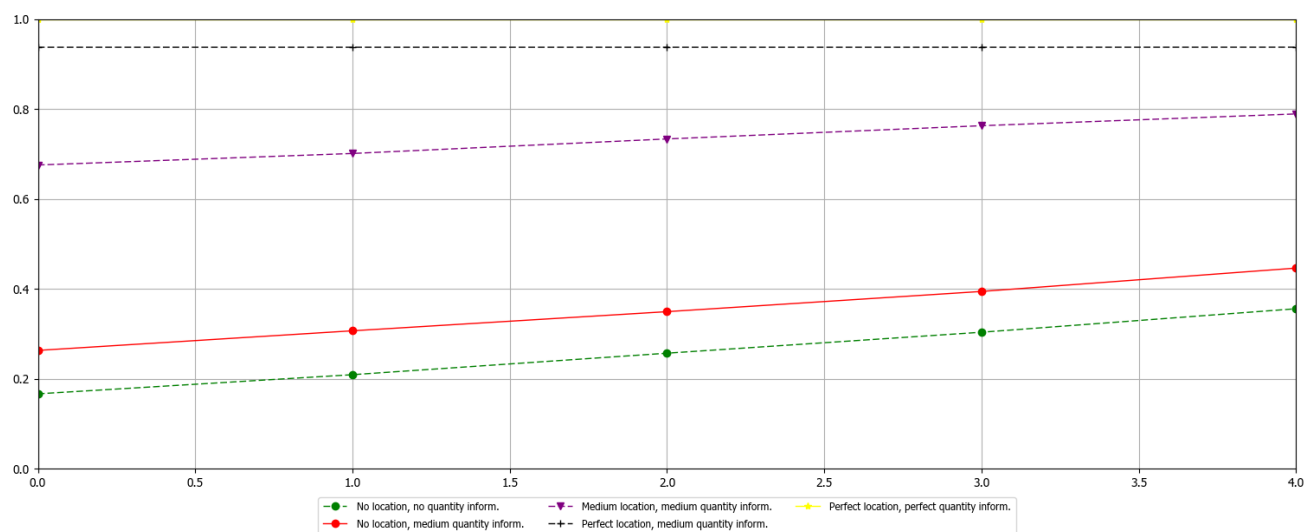

**Supplementary Figure. S6** Certancy function representation of ANN in left and LR in right. Represents a confidence map in the forecast, measured in percentage ranges from 0-100; where 100= complete confidence and no other alternative forecast are insignificant and complete 0 means = complete uncertainty showing, with at least one or more alternative with the same likelihood of realization. a. Represents the certancy function for LR model b. represents the certancy function of ANN model. All maps were generated using ArcGIS Ver. 10.6.

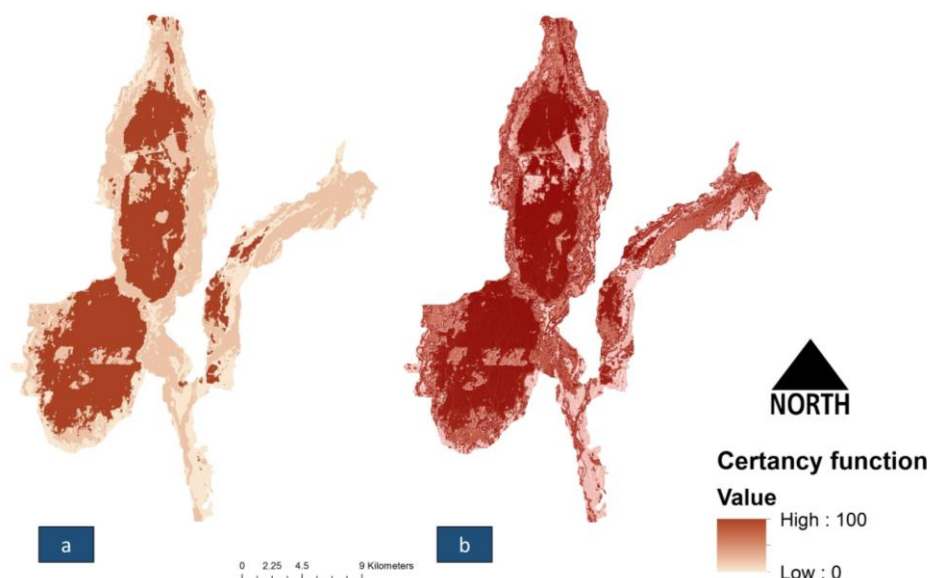

**Supplementary Table S4.** Transitional probability matrix of Landcover change from the year 2018-2028 stimulated by logistic regression (LR) model and from 2018-2028 Artificial neural network (ANN) stimulated model.

| Transition period      | To         | Water    | River bank | Bare land | Woodland | Grassland | Shrubland |
|------------------------|------------|----------|------------|-----------|----------|-----------|-----------|
| <b>2018-2028 (LR)</b>  |            |          |            |           |          |           |           |
| <b>From</b>            | Water      | 0.290492 | 0.324511   | 0.037998  | 0.001614 | 0.269042  | 0.076342  |
|                        | River bank | 0.106275 | 0.721247   | 0.093778  | 0.000646 | 0.06909   | 0.008964  |
|                        | Bare land  | 0.044431 | 0.017671   | 0.373545  | 0.024509 | 0.080877  | 0.458967  |
|                        | Woodland   | 0.000183 | 0.000645   | 0.000403  | 0.957844 | 0.013422  | 0.027503  |
|                        | Grassland  | 0.001916 | 0.000252   | 0.000593  | 0.248112 | 0.552985  | 0.196142  |
|                        | Shrubland  | 0.013985 | 0.012243   | 0.076273  | 0.016682 | 0.416839  | 0.463978  |
| <b>2018-2028 (ANN)</b> |            |          |            |           |          |           |           |
|                        | Water      | 0.715332 | 0          | 0         | 0.004152 | 0.276711  | 0.003806  |
|                        | River bank | 0        | 0.707802   | 0         | 0.000304 | 0.291477  | 0.000418  |
|                        | Bare land  | 0        | 0          | 0.708776  | 0.000637 | 0.289653  | 0.000935  |
|                        | Woodland   | 0        | 0          | 0         | 0.96922  | 0.00041   | 0.030369  |
|                        | Grassland  | 0        | 0          | 0         | 0.235706 | 0.755645  | 0.008649  |
|                        | Shrubland  | 0        | 0          | 0         | 0.011038 | 0.266793  | 0.722168  |

**Supplementary Table S5.** Representing all transition types in hectars (ha) from one cover type to another from 2018 to ANN stimulated 2028 landcover.

|     | <b>Transition type</b> | <b>Area Hectare (ha)</b> |
|-----|------------------------|--------------------------|
| 1.  | Water to Water         | 1116.54                  |
| 2.  | Water to Woodland      | 6.48                     |
| 3.  | Water to Grassland     | 431.91                   |
| 4.  | Water to Shrubland     | 5.94                     |
| 5.  | Riverbank to Riverbank | 1677.15                  |
| 6.  | Riverbank to Woodland  | 0.72                     |
| 7.  | Riverbank to Grassland | 690.66                   |
| 8.  | Riverbank to Shrubland | 0.99                     |
| 9.  | Bareland to Bareland   | 1501.74                  |
| 10. | Bareland to Woodland   | 1.35                     |
| 11. | Bareland to Grassland  | 613.71                   |
| 12. | Bareland to Shrubland  | 1.98                     |
| 13. | Woodland to Woodland   | 11899.98                 |
| 14. | Woodland to Grassland  | 5.04                     |
| 15. | Woodland to Shrubland  | 372.87                   |
| 16. | Grassland to Woodland  | 1682.55                  |
| 17. | Grassland to Grassland | 5394.06                  |
| 18. | Grassland to Shrubland | 61.74                    |
| 19. | Shrubland to Woodland  | 75.87                    |
| 20. | Shrubland to Grassland | 1833.75                  |
| 21. | Shrubland to Shrubland | 4963.68                  |

**Supplementary Table S6** Representing all transition types in hectars (ha) from one cover type to another from 2018 to (LR) stimulated 2028 landcover.

|     | <b>Transition type</b> | <b>Area Hectare (ha)</b> |
|-----|------------------------|--------------------------|
| 1.  | Water to Water         | 453.42                   |
| 2.  | Water to Riverbank     | 506.52                   |
| 3.  | Water to Bareland      | 59.31                    |
| 4.  | Water to Woodland      | 2.52                     |
| 5.  | Water to Grassland     | 419.94                   |
| 6.  | Water to Shrubland     | 119.16                   |
| 7.  | Riverbank to Water     | 251.82                   |
| 8.  | Riverbank to Riverbank | 1709.01                  |
| 9.  | Riverbank to Bareland  | 222.21                   |
| 10. | Riverbank to Woodland  | 1.53                     |
| 11. | Riverbank to Grassland | 163.71                   |
| 12. | Riverbank to Shrubland | 21.24                    |
| 13. | Bareland to Water      | 94.14                    |
| 14. | Bareland to Riverbank  | 37.44                    |
| 15. | Bareland to Bareland   | 791.46                   |

|     |                        |         |
|-----|------------------------|---------|
| 16. | Bareland to Woodland   | 51.93   |
| 17. | Bareland to Grassland  | 171.36  |
| 18. | Bareland to Shrubland  | 972.45  |
| 19. | Woodland to Water      | 2.25    |
| 20. | Woodland to Riverbank  | 7.92    |
| 21. | Woodland to Bareland   | 4.95    |
| 22. | Woodland to Woodland   | 11760.3 |
| 23. | Woodland to Grassland  | 164.79  |
| 24. | Woodland to Shrubland  | 337.68  |
| 25. | Grassland to Water     | 13.68   |
| 26. | Grassland to Riverbank | 1.8     |
| 27. | Grassland to Bareland  | 4.23    |
| 28. | Grassland to Woodland  | 1771.11 |
| 29. | Grassland to Grassland | 3947.4  |
| 30. | Grassland to Shrubland | 1400.13 |
| 31. | Shrubland to Water     | 96.12   |
| 32. | Shrubland to Riverbank | 84.15   |
| 33. | Shrubland to Bareland  | 524.25  |
| 34. | Shrubland to Woodland  | 114.66  |
| 35. | Shrubland to Grassland | 2865.06 |
| 36. | Shrubland to Shrubland | 3189.06 |

**Supplementary Figure. S7** Transition potential showing different transition types in study area. With different colour ramp indicates different transition types in the study landscape from the year 2018 to 2028. a. Represents transition from one cover type to another from 2018 to ANN model for 2028. b. Represents transition from one cover type to another from 2018 to LR model for 2028. All maps were generated using ArcGIS Ver. 10.6.

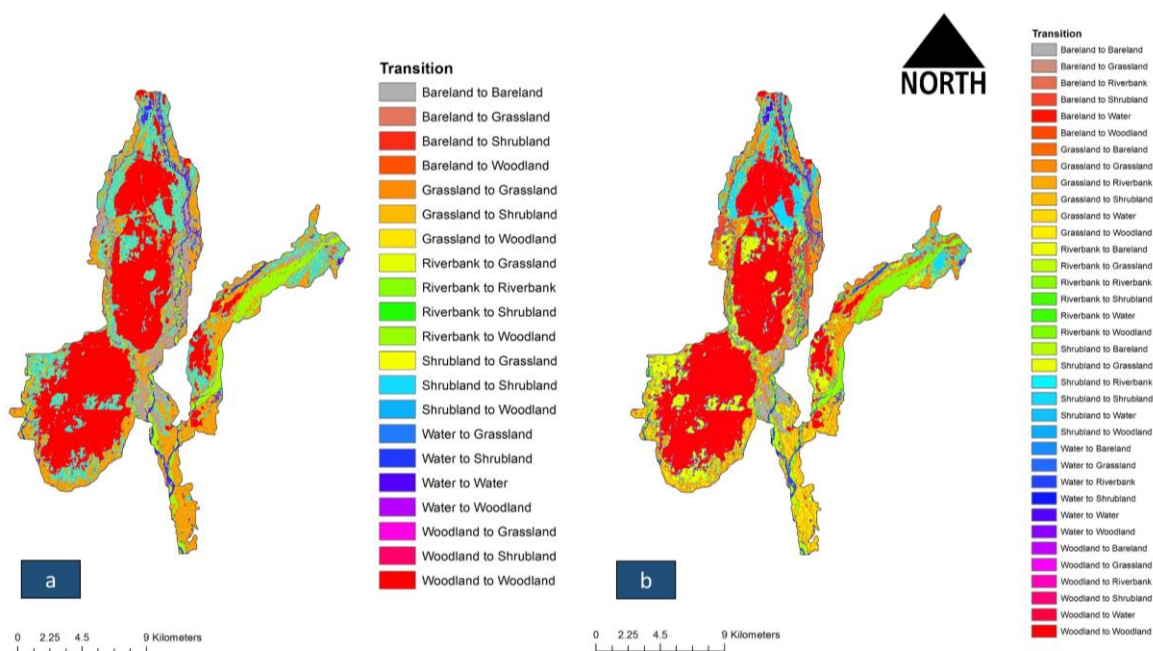



**Supplementary Table S7.** List of selected eco geographic variables used for suitability modeling. Eco-geographical variables were categorised into two scales i.e. Land cover class-level variables and Landscape-level variables. The landcover class-level variables were generated by vectorization of the landcover classes followed by generating euclidian distance using ArcGIS 10.6 software. Whereas the landscape-level metrics were computed by using the moving window function of FRAGSTAT Ver. 4.2 software.

| <b>Variables</b>                                           | <b>Code</b> | <b>Type</b> |
|------------------------------------------------------------|-------------|-------------|
| <b>Landscape-level variables</b>                           |             |             |
| Area (area-weighted mean)                                  | area_am     | Continuous  |
| Euclidian distance function from bare land landcover type  | Bare_land   | Continuous  |
| Euclidian distance function from grassland landcover type  | Grassland   | Continuous  |
| Interspersion and Juxtaposition Index                      | Iji         | Continuous  |
| Landscape Shape Index                                      | lsi         | Continuous  |
| Number of patches                                          | np          | Continuous  |
| <b>Land cover class-level variables</b>                    |             |             |
| Euclidian distance function from river bank landcover type | River_bank  | Continuous  |
| Euclidian distance function from shrubland landcover type  | Shrubland   | Continuous  |
| Euclidian distance function from water                     | Water       | Continuous  |
| Euclidian distance function from woodland landcover type   | Woodland    | Continuous  |

**Supplementary Figure S8.** Model evaluation plot, showing the average training ROC of both training and cross-validation (CV) for the replicate runs under 5 models where **a.** showing ROC plot of boosted regression tree (BRT) **b.** generalized linear model (GLM), **c.** multivariate adaptive regression splines (MARS), **d.** Maximum entropy (MaxEnt), **e.** Random forest (RF).

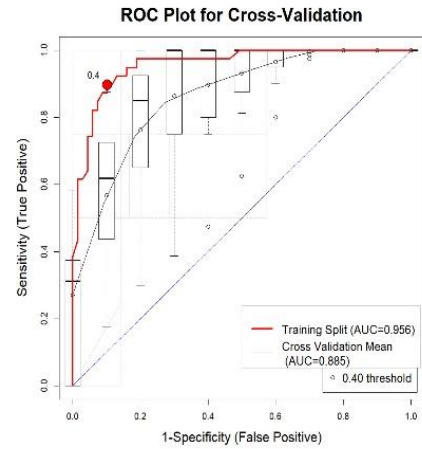**a**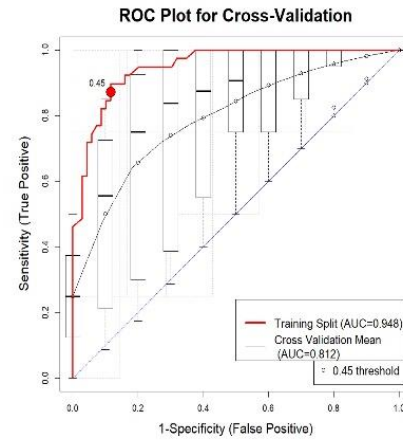**b**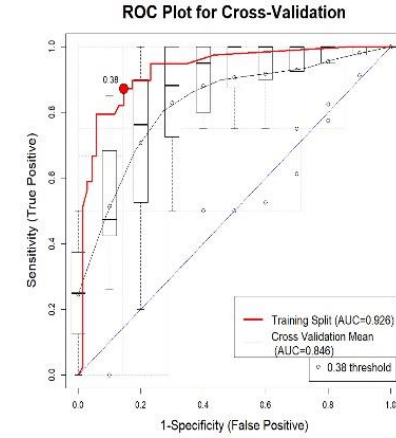**c**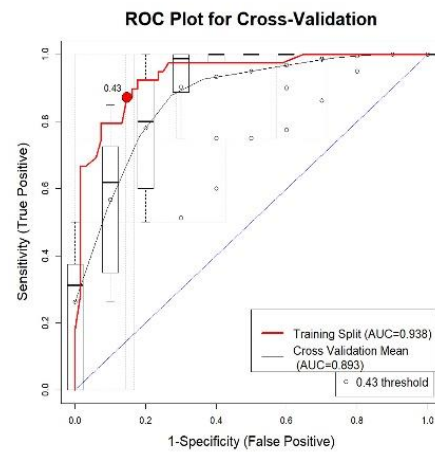**d**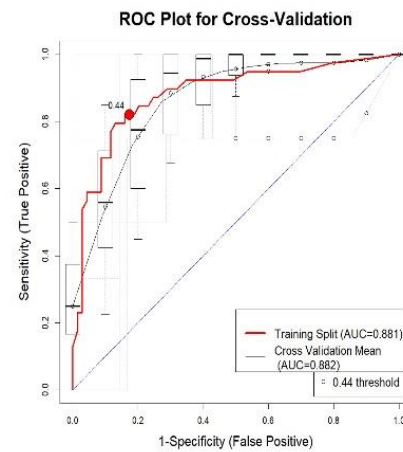**e**

**Supplementary Figure. S9.** Confusion matrixes, Model Calibration plots and Residual plots. **Row 1** represents spatial pattern of residuals where colour ramp indicates the magnitude of deviance and size represents the quantity. **Row 2** represents model calibration plot across all 5 different model for cross-validation split. **Row 3** represents confusion matrix for all 5 models, plotted by observed vs. predicted where colour ramp from lowest value 0% (white) to 100% (red) indicates the quantification of particular pair types. **Column a.** represents plots for BRT, **Column b.** represents plots for GLM, **Column c.** represents plots for MARS, **Column d.** represents plots for MaxEnt and **Column e.** represents plots for e. RF.

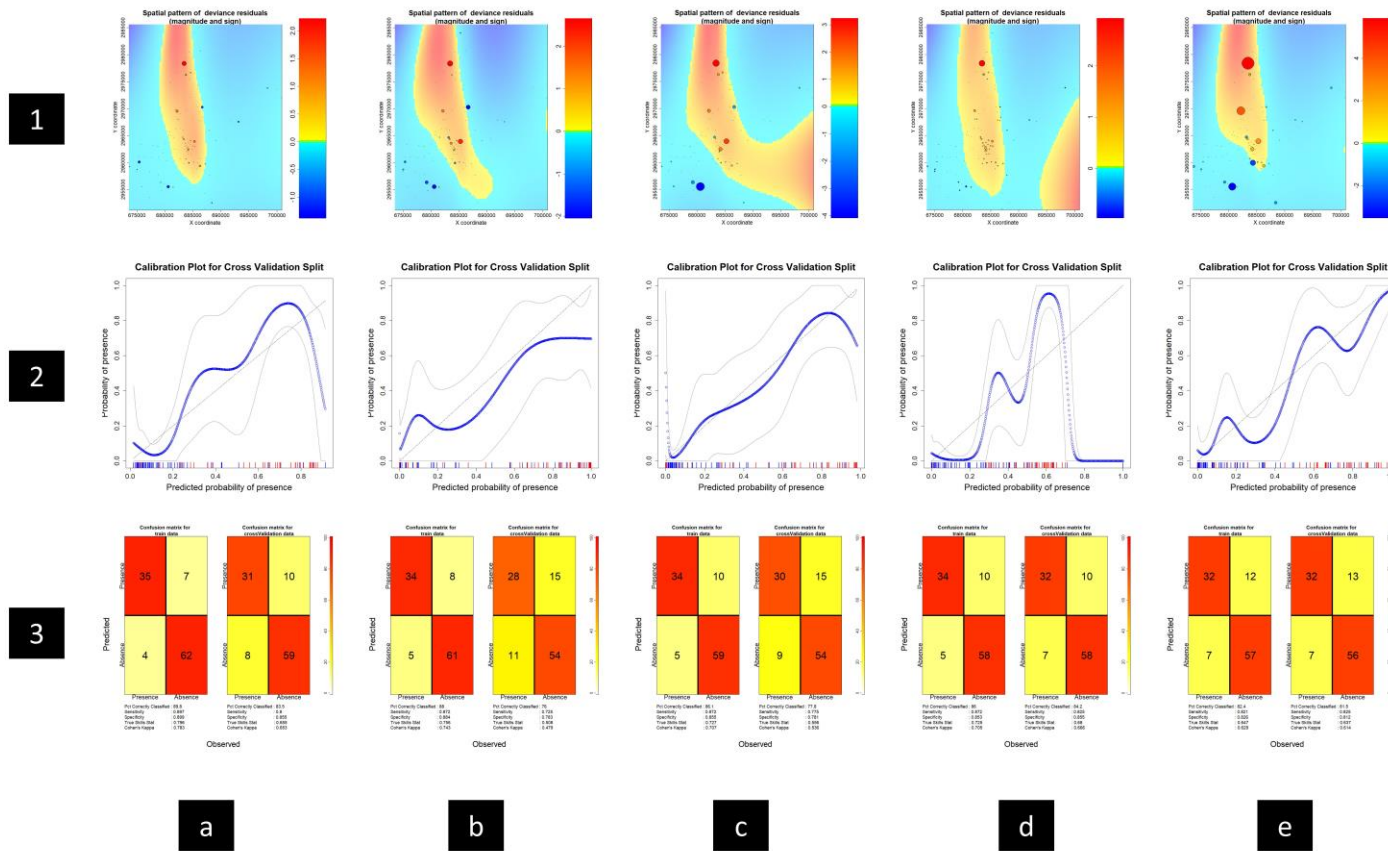

**Supplementary Figure. S10.** Evaluation Matrix performance across model runs. Brown- represents the correlation coefficient among the 5 different models. **Yellow-** represents the proportion of deviance explained; **Green-** represents the Proportion of correctly classified; **Blue-** represents Area under curve (AUC) and **Pink-** represents true skill statistics.

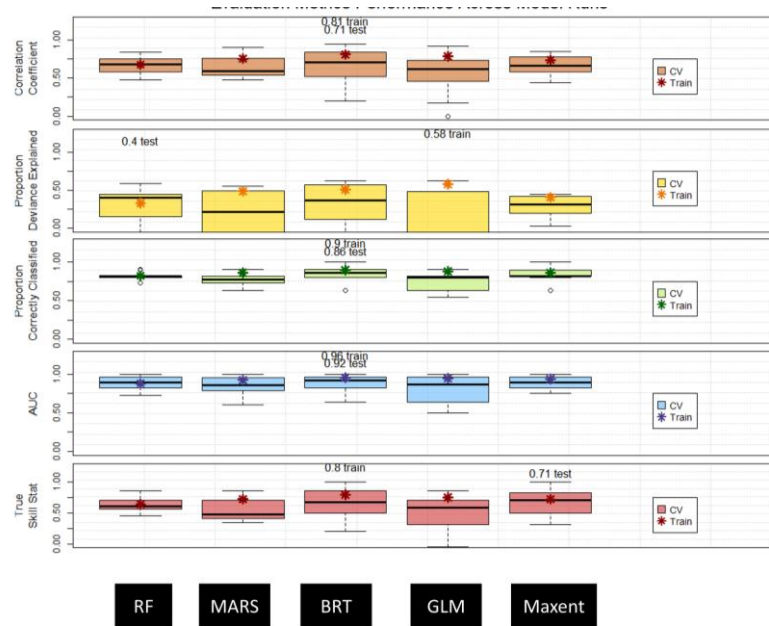

**Supplementary Figure. S11. Ensemble probability surfaces from 1998 to 2028.** Ensemble models of average habitat suitability from 5 different modelling algorithms including generalized linear model (GLM), multivariate adaptive regression splines (MARS), boosted regression tree (BRT), Random forest (RF) and Maximum entropy (MaxEnt) for Rhino in Gorumara National park along with its buffer forests including Chapramari and Bridge area. Starting from left represents the ensemble suitability for the year 1998 followed by 2008, 2018 and on extreme right hand, represents habitat suitability for future landscape 2028. All maps were generated using ArcGIS Ver. 10.6.

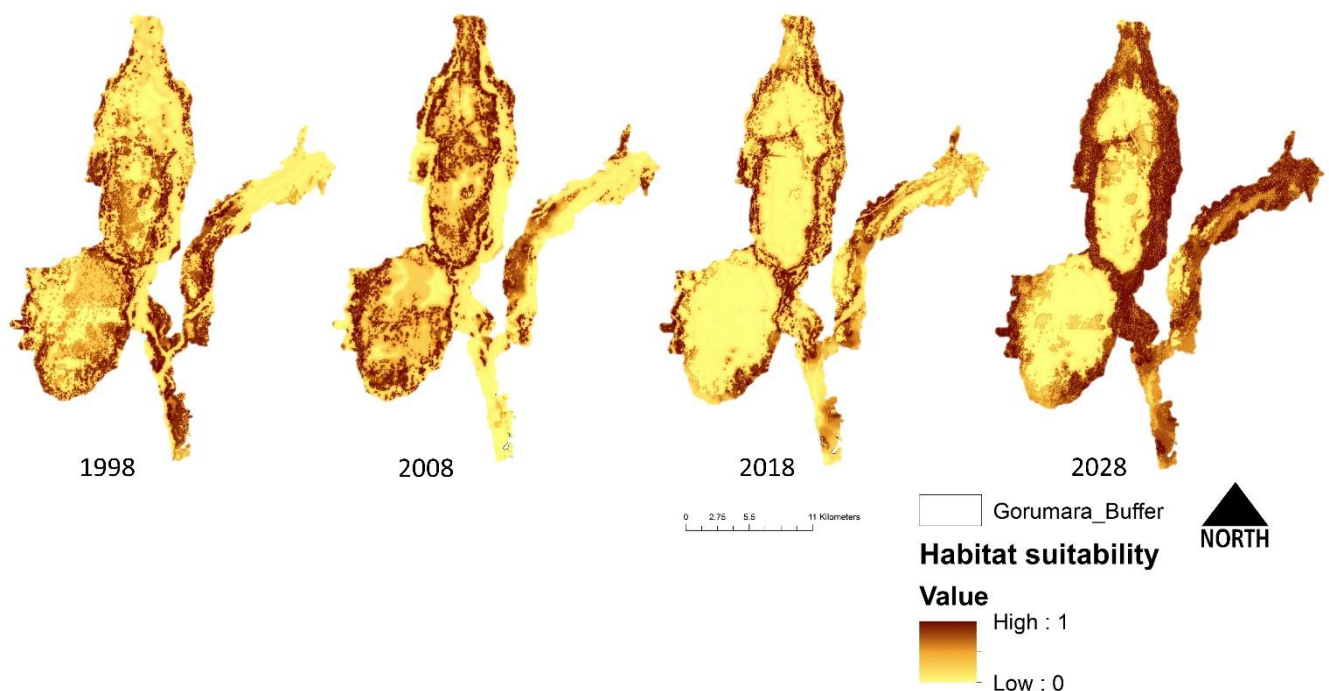

**Supplementary Table S8.** Change in most suitable area across multitemporal ensemble surfaces. Computed on the basis of maximum model agreement i.e. 5, from 1998 to 2008; 2008 to 2018 and fro, 2018 to 2028.

| 1998                  | 2008                  | $\Delta$              | 1998%  | 2008%  | $\Delta$ % |
|-----------------------|-----------------------|-----------------------|--------|--------|------------|
| 53.95 Km <sup>2</sup> | 60.59 Km <sup>2</sup> | 6.64 Km <sup>2</sup>  | 16.976 | 19.066 | 2.090      |
| 2008                  | 2018                  | $\Delta$              | 2008%  | 2018%  | $\Delta$ % |
| 60.59 Km <sup>2</sup> | 53.10 Km <sup>2</sup> | -7.49 Km <sup>2</sup> | 19.066 | 16.708 | -2.358     |
| 2018                  | 2028                  | $\Delta$              | 2018%  | 2028%  | $\Delta$ % |
| 53.10 Km <sup>2</sup> | 97.15 Km <sup>2</sup> | 44.05 Km <sup>2</sup> | 16.707 | 30.569 | 13.861     |

**Supplementary Figure. S12.** Simplified Methodological flow chart of the study. Where blue boxes represents the major section of the work design and arrow represents the direction of the work flow.

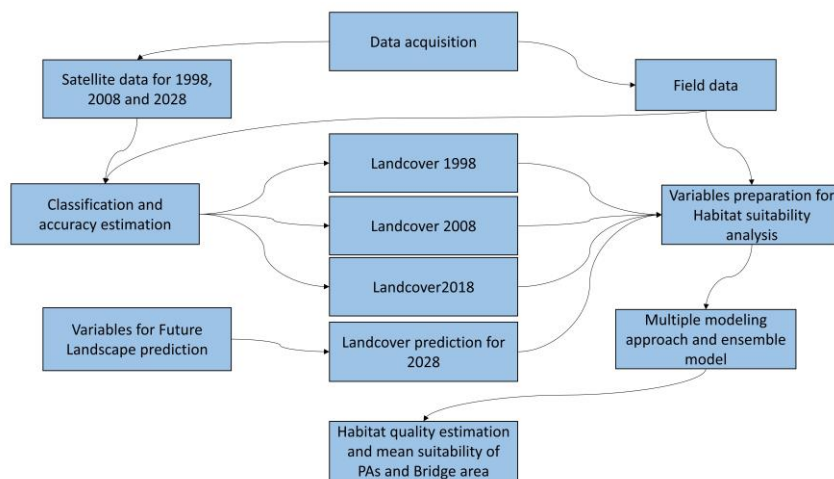

**Supplementary Table S9.** List of all eco-geographical variables for suitability modeling. Eco-geographical variables were categorised into two scales i.e. Land cover class-level variables and Landscape-level variables. The landcover class-level variables were generated by vectorization of the landcover classes followed by generating euclidian distance using ArcGIS 10.6 software. Whereas the landscape-level metrics were computed by using the moving window function of FRAGSTAT Ver. 4.2 software.

| Sl. No.                          | Variable                                     | Code     | Type       |
|----------------------------------|----------------------------------------------|----------|------------|
| <b>Landscape-level variables</b> |                                              |          |            |
| 1.                               | Number of Patches                            | NP       | Continuous |
| 2.                               | Patch Density                                | PD       | Continuous |
| 3.                               | Total Edge                                   | TE       | Continuous |
| 4.                               | Edge Density                                 | ED       | Continuous |
| 5.                               | Landscape Shape Index                        | LSI      | Continuous |
| 6.                               | Contagion                                    | CONTAG   | Continuous |
| 7.                               | Percentage of Like Adjacencies               | PLADJ    | Continuous |
| 8.                               | Interspersion & Juxtaposition Index          | IJI      | Continuous |
| 9.                               | Patch Cohesion Index                         | COHESION | Continuous |
| 10.                              | Landscape Division Index                     | DIVISION | Continuous |
| 11.                              | Effective Mesh Size                          | MESH     | Continuous |
| 12.                              | Splitting Index                              | SPLIT    | Continuous |
| 13.                              | Patch Richness Density                       | PRD      | Continuous |
| 14.                              | Shannon's Diversity Index                    | SHDI     | Continuous |
| 15.                              | Patch Area Distribution (area-weighted mean) | area_am  | Continuous |

|                                        |                                                            |            |            |
|----------------------------------------|------------------------------------------------------------|------------|------------|
| <b>16.</b>                             | Aggregation Index                                          | AI         | Continuous |
| <b>Landcover class-level variables</b> |                                                            |            |            |
| <b>17.</b>                             | Euclidian distance function from bare land landcover type  | Bare_land  | Continuous |
| <b>18.</b>                             | Euclidian distance function from grassland landcover type  | Grassland  | Continuous |
| <b>19.</b>                             | Euclidian distance function from river bank landcover type | River_bank | Continuous |
| <b>20.</b>                             | Euclidian distance function from shrubland landcover type  | Shrubland  | Continuous |
| <b>21.</b>                             | Euclidian distance function from water                     | Water      | Continuous |
| <b>22.</b>                             | Euclidian distance function from woodland landcover type   | Woodland   | Continuous |
